# Supplementary material for: Chiral nematic liquid crystal droplets as a basis for sensor systems
Source: Royal Society of Chemistry journal article supplement (doi:10.1039/d1me00189b), 2022-01-01
Supplement: d1me00189b1.pdf [file d1me00189b1.pdf]

Supplementary Information

## **Chiral Nematic Liquid Crystal Droplets as a Basis for Sensor Systems**

Daniel A. Paterson,<sup>\*a,b</sup> Xiaoxue Du,<sup>a,d</sup> Peng Bao,<sup>a</sup> Adele A. Parry,<sup>a</sup> Sally A. Peyman,<sup>a,c</sup>  
Jonathan A. T Sandoe,<sup>c</sup> Stephen D. Evans,<sup>a</sup> Dan Luo,<sup>d</sup> Richard J. Bushby,<sup>b</sup> J. Cliff Jones,<sup>a</sup>  
Helen F. Gleeson<sup>\*a</sup>

<sup>a</sup> *School of Physics and Astronomy, University of Leeds, Leeds, LS2 9JT, UK*

<sup>b</sup> *School of Chemistry, University of Leeds, Leeds, LS2 9JT, UK*

<sup>c</sup> *Leeds Institute of Medical Research, University of Leeds, Leeds, LS2 9JT, UK*

<sup>d</sup> *Department of Electrical and Electronic Engineering, Southern University of  
Science and Technology, Shenzhen, 518055, China*

## Contents

### 1. Energy comparison for rotating a LC droplet or reorienting its director field

Table ST1.

Table ST2.

Table ST3.

Figure S1. Plot demonstrating the cross-over point at which it becomes more energetically favourable to reorient the director rather than rotate the droplet.

### 2. Tables

Table ST4. Chiral LC mixtures.

### 3. Figures

Figure S2. Plots of the reflection spectra of 5CB doped with 7.3 wt% S1011 as a function of temperature.

Figure S3. Plots of the reflection spectra of E7 doped with 8.2 wt% S1011 as a function of temperature.

### 4. Videos

Video SV1. A video of a DOPC:DOPG coated droplet of MLC7023 doped with 0.53 wt% S1011 and switched with 0.1 wt% SDS.

Video SV2. A video of a DOPC:DOPG coated droplet of MLC7023 doped with 1.9 wt% R5011 and switched with 0.1 wt% SDS.

Video SV3. A video of an array of DOPC:DOPG coated droplets of MLC7023 doped with 1.9 wt% R5011 and switched with 0.1 wt% SDS.

## 1. Energy comparison for rotating a LC droplet or reorienting its director field

If we assume a 10  $\mu\text{m}$  diameter droplet rotates at  $2\pi\text{s}^{-1}$ :

The rotational kinetic energy of the droplet is given by;

$$U_r = \frac{1}{5}mr^2\omega^2, \quad (1)$$

Mass of droplet  $m$ ;

$$m = \frac{4\pi}{3}\rho r^3, \quad (2)$$

Hence;

$$U_r = \frac{4\pi}{15}\rho r^5\omega^2, \quad (3)$$

The strong  $r^5$  dependence on droplet size is because the mass of the droplet increases with  $r^3$  and the rotational energy increases with  $r^2$ .

**Table ST1.** Example values of rotational kinetic energy ( $U_r$ ) for a droplet of 5CB ( $\rho = 1.01 \text{ kgm}^{-3}$ ) with droplet diameters of 10 and 20  $\mu\text{m}$ .

| $4\pi/15$ | $\rho \text{ (kgm}^{-3}\text{)}$ | $r \text{ (m)}$       | $\omega \text{ (rads}^{-1}\text{)}$ | $U_r \text{ (J)}$      |
|-----------|----------------------------------|-----------------------|-------------------------------------|------------------------|
| 0.838     | $1.01 \times 10^3$               | $1.00 \times 10^{-5}$ | 6.28                                | $3.31 \times 10^{-21}$ |
| 0.838     | $1.01 \times 10^3$               | $2.00 \times 10^{-5}$ | 6.28                                | $1.06 \times 10^{-19}$ |

For a droplet of  $r = 10 \mu\text{m}$ ,  $3.31 \times 10^{-21} \text{ J}$  is needed to rotate the droplet once per second; whereas for a droplet of  $r = 20 \mu\text{m}$ ,  $1.06 \times 10^{-19} \text{ J}$  is need to rotate the droplet once a second. This is double the order of magnitude.

### Reorienting the director field of a droplet

Approximating the droplet to a cylinder of dimension  $2r$ , we can then approximate this to a circular section with a cell gap of  $2r$ . Estimating that the director switches the bulk of the droplet in  $\sim 2V$  and that the change in capacitance is  $\sim 50\%$  of  $\Delta\epsilon$  (which is  $\approx 20$ );

$$U_n = \frac{1}{2} \Delta C V^2, \quad (4)$$

$$\Delta C = \frac{\pi r^2}{2r} \varepsilon_0 \Delta \varepsilon = \frac{\pi \varepsilon_0}{2} r \Delta \varepsilon, \quad (5)$$

$$U_n = \frac{\pi \varepsilon_0}{4} r \Delta \varepsilon V^2, \quad (6)$$

As the droplet increases in radius, so does the volume of fluid in which the elastic deformation is taking place. This will follow  $r^3$ . However, as  $r$  increases, the same elastic energy decreases and this will follow  $r^2$ .

**Table ST2.** Example values of director reorientation energy ( $U_n$ ) for a droplet of 5CB with droplet diameters of 10 and 20  $\mu\text{m}$ .

| $\pi\varepsilon_0/4$   | K (pN) | $\Delta\varepsilon$ | V (V) | r (m)                 | $U_n$ (J)              |
|------------------------|--------|---------------------|-------|-----------------------|------------------------|
| $6.91 \times 10^{-12}$ | 30     | 20                  | 2.00  | $1.00 \times 10^{-5}$ | $5.53 \times 10^{-15}$ |
| $6.91 \times 10^{-12}$ | 30     | 20                  | 2.00  | $2.00 \times 10^{-5}$ | $1.11 \times 10^{-14}$ |

Therefore, for a small droplet, it is easier to rotate the whole droplet than to reorient the director field.

\*These values assume  $K \approx 30$  pN. A  $K \approx 15$  pN (closer to a real value for 5CB) is used below but the order of magnitude for  $U_n$  remains unchanged.

### Cross-over droplet size

The point at which  $U_n = U_r$  allows for a cross-over radius to be found;

$$r^4 = \frac{15\varepsilon_0 \Delta \varepsilon V^2}{16 \rho \omega^2}, \quad (7)$$

**Table ST3.** Example values of rotational kinetic energy ( $U_r$ ) and director reorientation energy ( $U_n$ ) for a droplet of 5CB.

| $4\pi/15$ | $\rho$<br>( $\text{kgm}^{-3}$ ) | r (m)                 | $\omega$<br>( $\text{rads}^{-1}$ ) | $U_r$ (J)              | $\pi\varepsilon_0/4$   | K<br>(pN) | $\Delta\varepsilon$ | V (V) | $U_n$ (J)              |
|-----------|---------------------------------|-----------------------|------------------------------------|------------------------|------------------------|-----------|---------------------|-------|------------------------|
| 0.838     | $1.01 \times 10^3$              | $1.00 \times 10^{-5}$ | 6.28                               | $3.31 \times 10^{-21}$ | $6.91 \times 10^{-12}$ | 15        | 10                  | 2.00  | $2.76 \times 10^{-15}$ |
| 0.838     | $1.01 \times 10^3$              | $2.00 \times 10^{-5}$ | 6.28                               | $1.06 \times 10^{-19}$ | $6.91 \times 10^{-12}$ | 15        | 10                  | 2.00  | $5.53 \times 10^{-15}$ |
| 0.838     | $1.01 \times 10^3$              | $4.00 \times 10^{-5}$ | 6.28                               | $3.39 \times 10^{-18}$ | $6.91 \times 10^{-12}$ | 15        | 10                  | 2.00  | $1.11 \times 10^{-14}$ |
| 0.838     | $1.01 \times 10^3$              | $8.00 \times 10^{-5}$ | 6.28                               | 1.08                   | $6.91 \times 10^{-12}$ | 15        | 10                  | 2.00  | 2.21                   |

|       |                    |                       |      |                        |                        |    |    |      |                        |
|-------|--------------------|-----------------------|------|------------------------|------------------------|----|----|------|------------------------|
|       | $10^3$             | $10^{-5}$             |      | $\times 10^{-16}$      | $10^{-12}$             |    |    |      | $\times 10^{-14}$      |
| 0.838 | $1.01 \times 10^3$ | $1.60 \times 10^{-4}$ | 6.28 | $3.47 \times 10^{-15}$ | $6.91 \times 10^{-12}$ | 15 | 10 | 2.00 | $4.42 \times 10^{-14}$ |
| 0.838 | $1.01 \times 10^3$ | $3.20 \times 10^{-4}$ | 6.28 | $1.11 \times 10^{-13}$ | $6.91 \times 10^{-12}$ | 15 | 10 | 2.00 | $8.85 \times 10^{-14}$ |
| 0.838 | $1.01 \times 10^3$ | $6.40 \times 10^{-4}$ | 6.28 | $3.55 \times 10^{-12}$ | $6.91 \times 10^{-12}$ | 15 | 10 | 2.00 | $1.77 \times 10^{-13}$ |
| 0.838 | $1.01 \times 10^3$ | $1.28 \times 10^{-3}$ | 6.28 | $1.14 \times 10^{-10}$ | $6.91 \times 10^{-12}$ | 15 | 10 | 2.00 | $3.54 \times 10^{-13}$ |

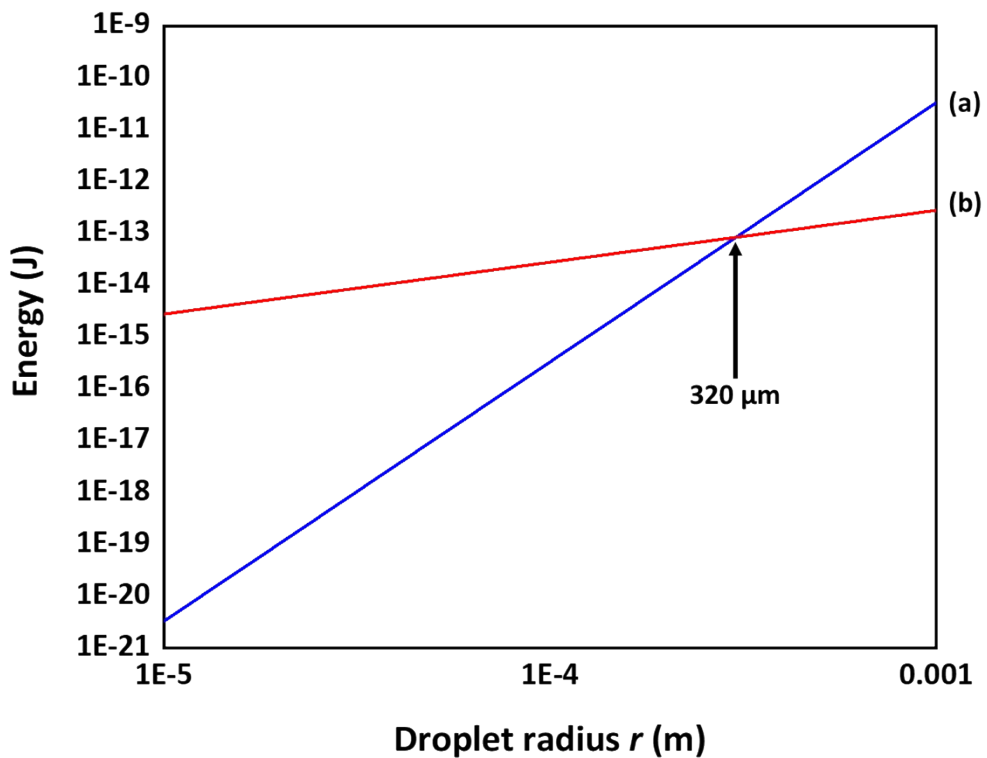

**Figure S1.** Plot of the cross-over point where it becomes more energetically favourable to reorient the director rather than the rotate the droplet. (a) Kinetic energy for rotation of a droplets of various sizes ( $U_r$ ), (b) director reorientation energy for droplets of varying size ( $U_n$ ).

It is clear that for droplets in the range 10 – 100  $\mu\text{m}$  it will always be less energetically costly to rotate the whole droplet than to reorient the director field. Whilst these calculations have been done with an assumption that  $K \approx 15 \text{ pN}$  it is highly likely a similar trend would emerge for less elastically costly materials.

## 2. Tables

**Table ST4.** The compositions of samples and their calculated pitch values.

| LC          | S1011 concentration (wt%) | R5011 concentration (wt%) | Calculated pitch (nm) |
|-------------|---------------------------|---------------------------|-----------------------|
| 5CB         | 7.3                       |                           | 343                   |
| 6CB         | 7.3                       |                           | 343                   |
| 7CB         | 7.4                       |                           | 337                   |
| 5CB         | 0.53                      |                           | 4717                  |
| E7          | 8.2                       |                           | 305                   |
| MLC702<br>3 |                           | 1.9                       | 439                   |
| MLC702<br>3 | 0.53                      |                           | 4717                  |

## 3. Figures

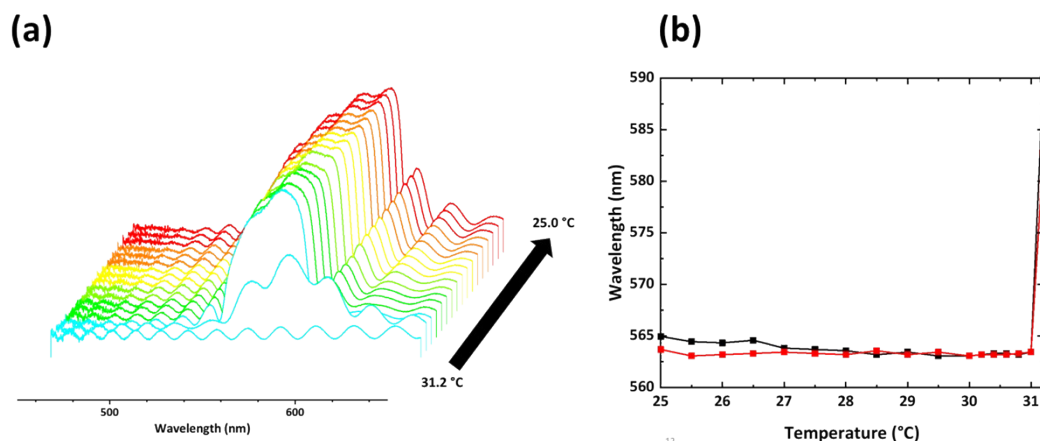

**Figure S2.** Temperature dependent reflection spectra of 5CB doped with 7.3 wt% S1011. (a) Reflection spectra obtained as the sample is cooled from the isotropic to 25 °C. The peak wavelength

## Supplementary Information

is 544 nm, and the full width at half maximum is 55 nm. (b) The peak wavelength plotted against temperature showing no temperature-dependence.

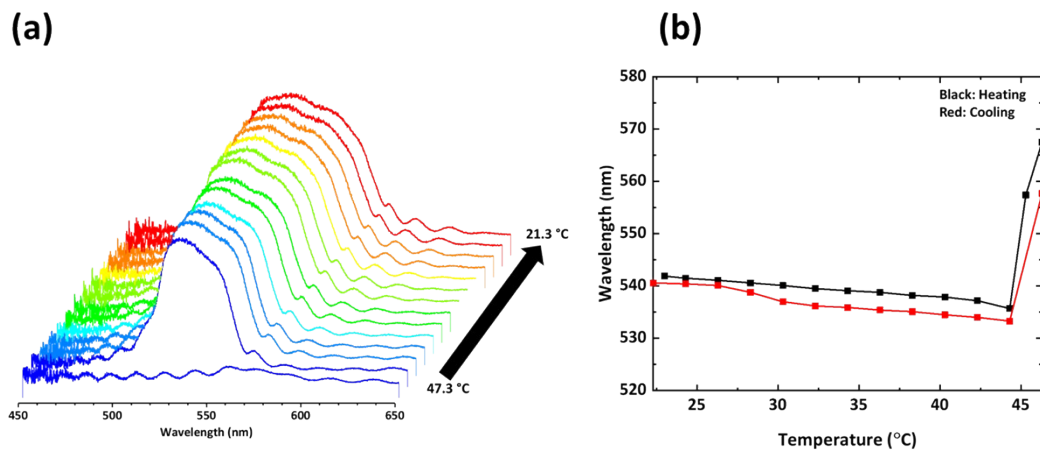

**Figure S3.** Temperature dependent reflection spectra of E7 doped with 8.2 wt% S1011. (a) Reflection spectra obtained as the sample is cooled from the isotropic to 21 °C. (b) The peak wavelength plotted against temperature showing no temperature-dependence.

## 4. Videos

**Video SV1.** A video of a DOPC:DOPG coated droplet of MLC7023 doped with 0.53 wt% S1011 and switched with 0.1 wt% SDS.

**Video SV2.** A video of a DOPC:DOPG coated droplet of MLC7023 doped with 1.9 wt% R5011 and switched with 0.1 wt% SDS.

**Video SV3.** A video of an array of DOPC:DOPG coated droplets of MLC7023 doped with 1.9 wt% R5011 and switched with 0.1 wt% SDS.
